# Supplementary material for: A Novel Detection Procedure for Mutations in the 23S rRNA Gene of Macrolide-Resistant Mycoplasma pneumoniae with Two Non-Overlapping Probes Amplification Assay
Source: MDPI journal article supplement (doi:10.3390/microorganisms12010062), 2023-12-28
Supplement: s1 [file s1]

## Supplementary

**Table S1. Comparison of the results about drug-resistance testing of *M. pneumoniae* with existing testing methods in 92 clinical specimens.**

| ID        | Sample Type     | $\Delta$ CT method |       |             | Results | Real-time PCR <sup>a</sup> | Culture <sup>b</sup> | 23S rRNA Mutation <sup>c</sup> |
|-----------|-----------------|--------------------|-------|-------------|---------|----------------------------|----------------------|--------------------------------|
|           |                 | FAM                | VIC   | $\Delta$ CT |         |                            |                      |                                |
| ATCC29342 | Standard Strain | 15.92              | 15.75 | 0.17        | S       | Pos                        | Pos                  | None                           |
| ATCC15531 | Standard Strain | 16.95              | 16.51 | 0.44        | S       | Pos                        | Pos                  | None                           |
| ATCC29085 | Standard Strain | 17.48              | 17.50 | 0.02        | S       | Pos                        | Pos                  | None                           |
| ATCC29343 | Standard Strain | 17.64              | 17.45 | 0.19        | S       | Pos                        | Pos                  | None                           |
| 1         | Oral Swab       | 23.65              | 26.14 | 2.49        | R       | Pos                        | Pos                  | A2063G                         |
| 2         | Oral Swab       | 24.94              | 27.77 | 2.84        | R       | Pos                        | Pos                  | A2063T                         |
| 3         | Oral Swab       | 25.04              | 25.00 | 0.03        | S       | Pos                        | Pos                  | None                           |
| 4         | Oral Swab       | 25.10              | 27.68 | 2.58        | R       | Pos                        | Pos                  | A2063G                         |
| 5         | Oral Swab       | 25.42              | 29.10 | 3.68        | R       | Pos                        | Pos                  | A2063G                         |
| 6         | Oral Swab       | 26.25              | 25.98 | 0.28        | S       | Pos                        | Pos                  | None                           |
| 7         | Oral Swab       | 26.60              | 26.18 | 0.42        | S       | Pos                        | Pos                  | None                           |
| 8         | Oral Swab       | 26.89              | 30.27 | 3.39        | R       | Pos                        | Pos                  | A2063G                         |
| 9         | Oral Swab       | 27.68              | 27.49 | 0.19        | S       | Pos                        | Pos                  | None                           |
| 10        | Oral Swab       | 28.88              | 32.70 | 3.83        | R       | Pos                        | Pos                  | A2063G                         |
| 11        | Oral Swab       | 29.01              | 28.93 | 0.08        | S       | Pos                        | Pos                  | None                           |
| 12        | Oral Swab       | 29.13              | 28.85 | 0.28        | S       | Pos                        | Neg                  | NT                             |
| 13        | Oral Swab       | 29.21              | 33.87 | 4.66        | R       | Pos                        | Pos                  | A2063G                         |
| 14        | Oral Swab       | 29.66              | 32.64 | 2.99        | R       | Pos                        | Pos                  | A2063G                         |
| 15        | Oral Swab       | 29.95              | 33.34 | 3.39        | R       | Pos                        | Pos                  | A2063G                         |
| 16        | Oral Swab       | 29.98              | 32.27 | 2.28        | R       | Pos                        | Neg                  | NT                             |
| 17        | Oral Swab       | 30.02              | 33.65 | 3.63        | R       | Pos                        | Pos                  | A2063G                         |
| 18        | Oral Swab       | 30.57              | 33.85 | 3.29        | R       | Pos                        | Neg                  | NT                             |
| 19        | Oral Swab       | 31.03              | 35.38 | 4.36        | R       | Pos                        | Pos                  | A2063G                         |
| 20        | Oral Swab       | 31.04              | 30.60 | 0.44        | S       | Pos                        | Pos                  | None                           |
| 21        | Oral Swab       | 31.07              | 34.80 | 3.73        | R       | Pos                        | Neg                  | NT                             |
| 22        | Oral Swab       | 31.15              | 34.45 | 3.30        | R       | Pos                        | Neg                  | NT                             |
| 23        | Oral Swab       | 31.58              | 35.97 | 4.39        | R       | Pos                        | Pos                  | A2063G                         |
| 24        | Oral Swab       | 31.98              | 35.72 | 3.74        | R       | Pos                        | Pos                  | A2064G                         |
| 25        | Oral Swab       | 32.12              | 37.85 | 5.73        | R       | Pos                        | Pos                  | A2063G                         |
| 26        | Oral Swab       | 32.35              | 35.46 | 3.11        | R       | Pos                        | Neg                  | NT                             |
| 27        | Oral Swab       | 32.60              | 37.90 | 5.30        | R       | Pos                        | Pos                  | A2063G                         |
| 28        | Oral Swab       | 33.34              | 38.28 | 4.94        | R       | Pos                        | Neg                  | NT                             |
| 29        | Oral Swab       | 33.73              | 37.50 | 3.76        | R       | Pos                        | Pos                  | A2064G                         |
| 30        | Oral Swab       | 33.91              | 38.83 | 4.92        | R       | Pos                        | Pos                  | A2063G                         |
| 31        | Oral Swab       | 34.64              | 39.55 | 4.90        | R       | Pos                        | Pos                  | A2063G                         |
| 32        | Oral Swab       | 34.82              | 40.88 | 6.06        | R       | Pos                        | Pos                  | A2063G                         |
| 33        | Oral Swab       | 34.89              | 40.57 | 5.68        | R       | Pos                        | Neg                  | NT                             |
| 34        | Oral Swab       | 35.08              | 41.01 | 5.94        | R       | Pos                        | Neg                  | NT                             |
| 35        | Oral Swab       | 35.09              | 40.84 | 5.75        | R       | Pos                        | Neg                  | NT                             |
| 36        | Oral Swab       | 35.44              | 40.44 | 5.01        | R       | Pos                        | Pos                  | A2063T                         |
| 37        | Oral Swab       | 35.45              | 40.80 | 5.35        | R       | Pos                        | Neg                  | NT                             |
| 38        | Oral Swab       | 35.54              | 40.42 | 4.88        | R       | Pos                        | Neg                  | NT                             |

|    |           |       |       |      |     |     |     |        |
|----|-----------|-------|-------|------|-----|-----|-----|--------|
| 39 | Oral Swab | 36.21 | 35.96 | 0.25 | S   | Pos | Neg | NT     |
| 40 | Oral Swab | 36.24 | 35.88 | 0.36 | S   | Pos | Neg | NT     |
| 41 | Oral Swab | 36.77 | 36.81 | 0.04 | S   | Pos | Neg | NT     |
| 42 | Oral Swab | 37.02 | 36.94 | 0.08 | S   | Pos | Neg | NT     |
| 43 | Oral Swab | 37.14 | 37.29 | 0.16 | S   | Pos | Neg | NT     |
| 44 | Oral Swab | 37.10 | 39.94 | 2.84 | R   | Pos | Neg | NT     |
| 45 | Oral Swab | 37.70 | 42.09 | 4.39 | R   | Pos | Neg | NT     |
| 46 | Oral Swab | 38.07 | 37.86 | 0.21 | S   | Pos | Neg | NT     |
| 47 | Oral Swab | 38.14 | 43.44 | 5.31 | R   | Neg | Neg | NT     |
| 48 | Oral Swab | 38.44 | 38.58 | 0.14 | S   | Pos | Neg | NT     |
| 49 | Oral Swab | 39.48 | 39.35 | 0.13 | S   | Pos | Neg | NT     |
| 50 | Oral Swab | 39.85 | 40.00 | 0.15 | S   | Pos | Neg | NT     |
| 51 | Oral Swab | 40.68 | NT    | >5   | R   | Pos | Neg | NT     |
| 52 | Oral Swab | 40.87 | NT    | >5   | R   | Pos | Neg | NT     |
| 53 | Oral Swab | Neg   | Neg   | Neg  | Neg | Neg | Neg | NT     |
| 54 | Oral Swab | Neg   | Neg   | Neg  | Neg | Neg | Neg | NT     |
| 55 | Oral Swab | Neg   | Neg   | Neg  | Neg | Pos | Neg | NT     |
| 56 | Oral Swab | Neg   | Neg   | Neg  | Neg | Neg | Neg | NT     |
| 57 | Oral Swab | Neg   | Neg   | Neg  | Neg | Neg | Neg | NT     |
| 58 | Oral Swab | Neg   | Neg   | Neg  | Neg | Neg | Neg | NT     |
| 59 | Oral Swab | Neg   | Neg   | Neg  | Neg | Neg | Neg | NT     |
| 60 | Oral Swab | Neg   | Neg   | Neg  | Neg | Neg | Neg | NT     |
| 61 | Oral Swab | Neg   | Neg   | Neg  | Neg | Neg | Neg | NT     |
| 62 | Oral Swab | Neg   | Neg   | Neg  | Neg | Pos | Neg | NT     |
| 63 | Oral Swab | Neg   | Neg   | Neg  | Neg | Neg | Neg | NT     |
| 64 | Oral Swab | Neg   | Neg   | Neg  | Neg | Neg | Neg | NT     |
| 65 | Oral Swab | Neg   | Neg   | Neg  | Neg | Pos | Neg | NT     |
| 66 | Oral Swab | Neg   | Neg   | Neg  | Neg | Neg | Neg | NT     |
| 67 | Oral Swab | Neg   | Neg   | Neg  | Neg | Neg | Neg | NT     |
| 68 | Oral Swab | Neg   | Neg   | Neg  | Neg | Neg | Neg | NT     |
| 69 | BALF      | 18.25 | 17.79 | 0.46 | S   | Pos | Pos | None   |
| 70 | BALF      | 19.18 | 18.86 | 0.32 | S   | Pos | Pos | None   |
| 71 | BALF      | 21.07 | 20.88 | 0.19 | S   | Pos | Pos | None   |
| 72 | BALF      | 21.11 | 20.87 | 0.24 | S   | Pos | Pos | None   |
| 73 | BALF      | 21.87 | 24.65 | 2.77 | R   | Pos | Pos | A2063G |
| 74 | BALF      | 23.63 | 27.55 | 3.92 | R   | Pos | Pos | A2063G |
| 75 | BALF      | 24.45 | 26.97 | 2.52 | R   | Pos | Pos | A2063G |
| 76 | BALF      | 24.79 | 27.73 | 2.94 | R   | Pos | Pos | A2063G |
| 77 | BALF      | 24.89 | 28.24 | 3.35 | R   | Pos | Pos | A2063G |
| 78 | BALF      | 25.01 | 25.08 | 0.08 | S   | Pos | Pos | None   |
| 79 | BALF      | 25.21 | 24.85 | 0.36 | S   | Pos | Pos | None   |
| 80 | BALF      | 25.60 | 28.99 | 3.40 | R   | Pos | Pos | A2063G |
| 81 | BALF      | 27.22 | 26.88 | 0.34 | S   | Pos | Neg | NT     |
| 82 | BALF      | 27.83 | 32.43 | 4.60 | R   | Pos | Pos | A2063G |
| 83 | BALF      | 28.11 | 32.13 | 4.02 | R   | Pos | Pos | A2064G |
| 84 | BALF      | 28.94 | 32.91 | 3.98 | R   | Pos | Pos | A2063G |
| 85 | BALF      | 29.21 | 29.25 | 0.04 | S   | Pos | Pos | None   |
| 86 | BALF      | 29.69 | 34.16 | 4.47 | R   | Pos | Pos | A2063G |
| 87 | BALF      | 34.18 | 38.69 | 4.51 | R   | Pos | Neg | NT     |

|    |      |     |     |     |     |     |     |    |
|----|------|-----|-----|-----|-----|-----|-----|----|
| 88 | BALF | Neg | Neg | Neg | Neg | Neg | Neg | NT |
| 89 | BALF | Neg | Neg | Neg | Neg | Neg | Neg | NT |
| 90 | BALF | Neg | Neg | Neg | Neg | Neg | Neg | NT |
| 91 | BALF | Neg | Neg | Neg | Neg | Neg | Neg | NT |
| 92 | BALF | Neg | Neg | Neg | Neg | Neg | Neg | NT |

Note: S: MSMP positive; R: MRMP positive; Pos: *M. pneumoniae* positive; Neg: *M. pneumoniae* negative; NT: Not detection; None: No nucleic acid mutations detected.

a, b, c: The testing data is sourced from previous publications (References 21,24,25).
